# Supplementary material for: Lipoprotein Lpp regulates the mechanical properties of the E. coli cell envelope
Source: PubMed Central journal article supplement (PMC7156740; doi:10.1038/s41467-020-15489-1), 2020-04-14
Supplement: 41467_2020_15489_MOESM1_ESM.pdf [file 41467_2020_15489_MOESM1_ESM.pdf]

**Supplementary Information for**

**Lipoprotein Lpp regulates the mechanical properties of the E. coli cell envelope**

Mathelié-Guinlet *et al.*

This PDF file includes supplementary figures 1 to 8.

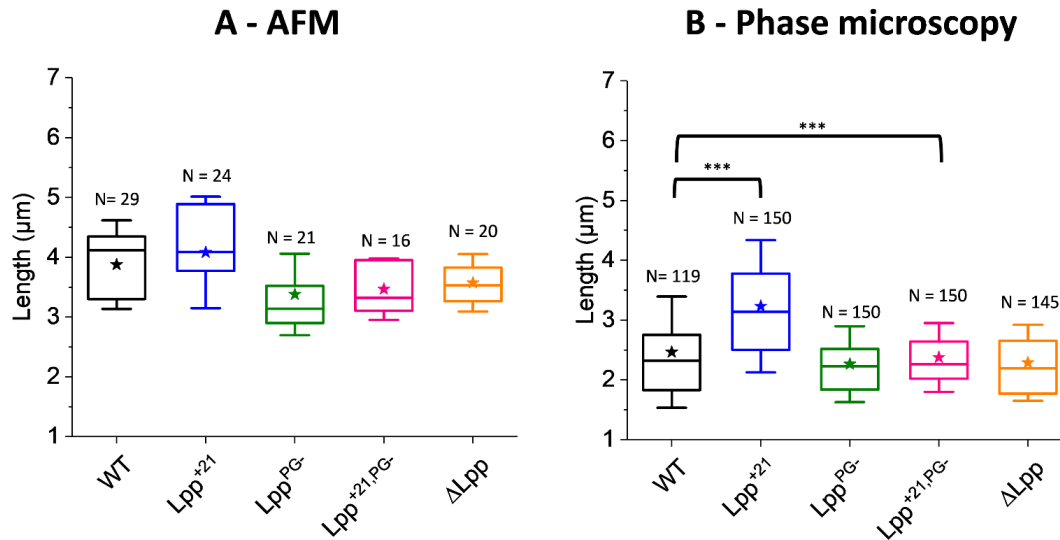

**Supplementary Figure 1. Effect of Lpp mutations on *E. coli* length.** Box plots reporting the length of each bacterial strain estimated from (A) AFM images and (B) phase microscopy cliches. Shown here are the mean values (star), the median, the 25% and 75% quartiles (boxes), and the standard deviation (whiskers) obtained from N independent cells over at least three independent experiments. \*\*\* indicates  $P \leq 0.0001$ . Source data are provided as a Source Data file.

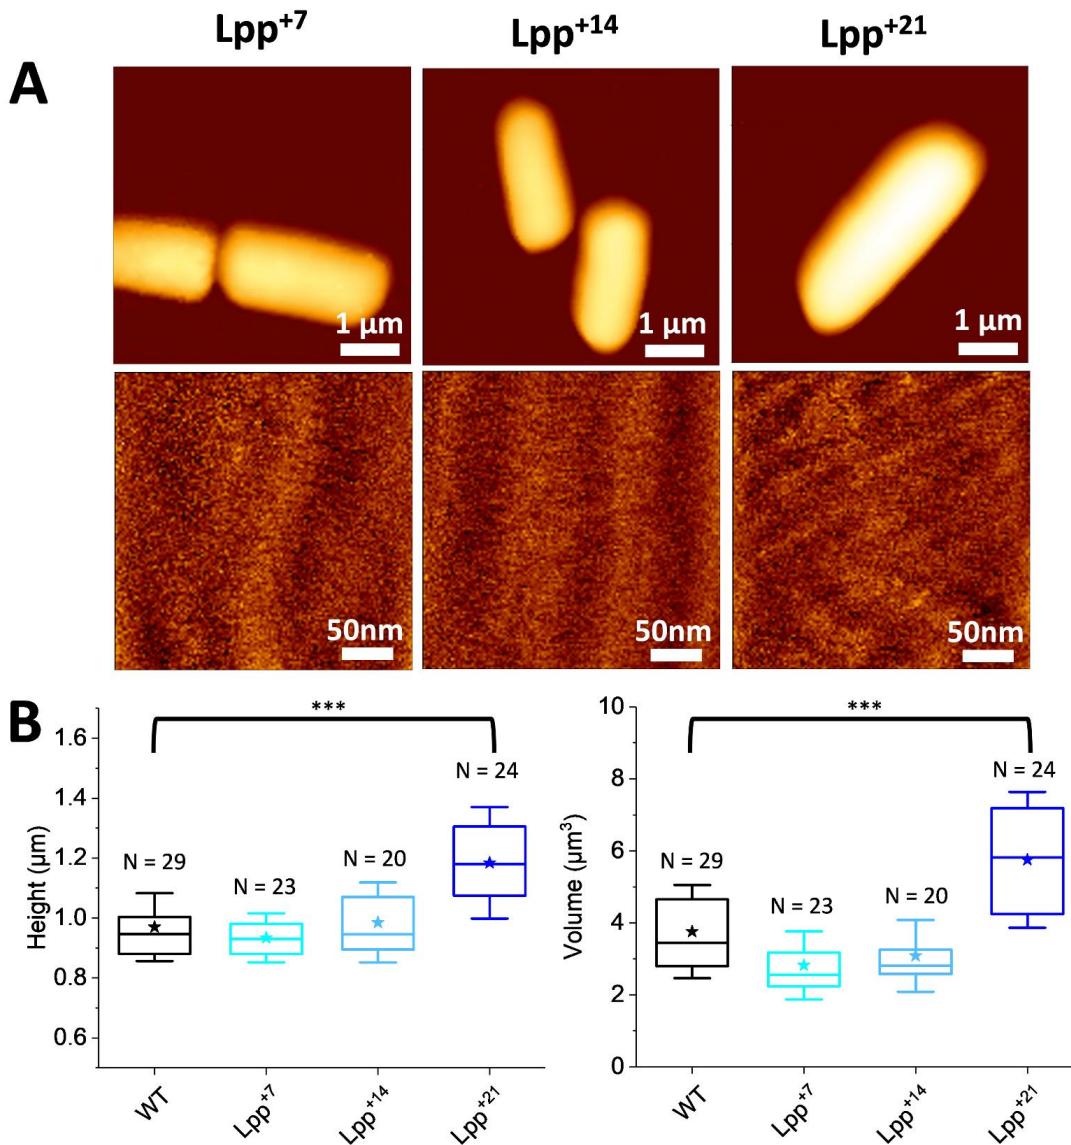

**Supplementary Figure 2. Effect of Lpp length on *E. coli* morphology.** (A) AFM height images in PBS showing *E. coli* cells with mutations on the length of Lpp (color scale: 1.2 μm). High-resolution height images recorded on top of the cells are also shown (color scale: 10 nm). These images are representative of at least three independent experiments. (B) Box plots reporting the height and volume of each bacterial strain exhibiting a longer version of Lpp, estimated from AFM images. Shown here are the mean values (star), the median, the 25% and 75% quartiles (boxes), and the standard deviation (whiskers) obtained from N independent cells over at least three independent experiments. \*\*\* indicates  $P \leq 0.0001$ . Source data are provided as a Source Data file.

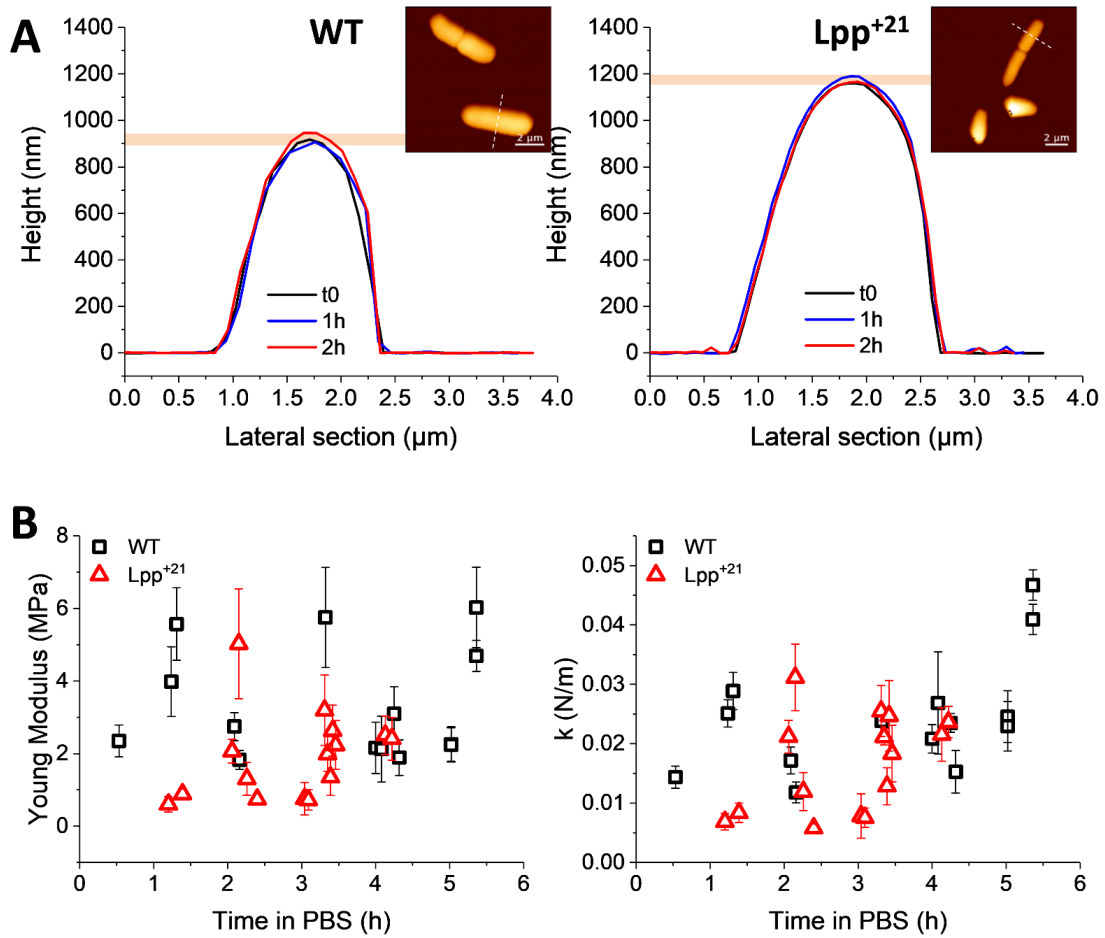

**Supplementary Figure 3. PBS has no influence on the morphology or mechanics of *E. coli* cells.** (A) Height profiles of the same cell (left – WT, right – Lpp<sup>+21</sup>) imaged in PBS over 2 h, showing no substantial changes in cell height. This is representative of at least three independent cells. (B) Mechanical properties of WT and Lpp<sup>+21</sup> cells as a function of the time spent in PBS, also showing no significant effect of PBS. Each dot represents one independent cell (mean  $\pm$  SD). Source data are provided as a Source Data file.

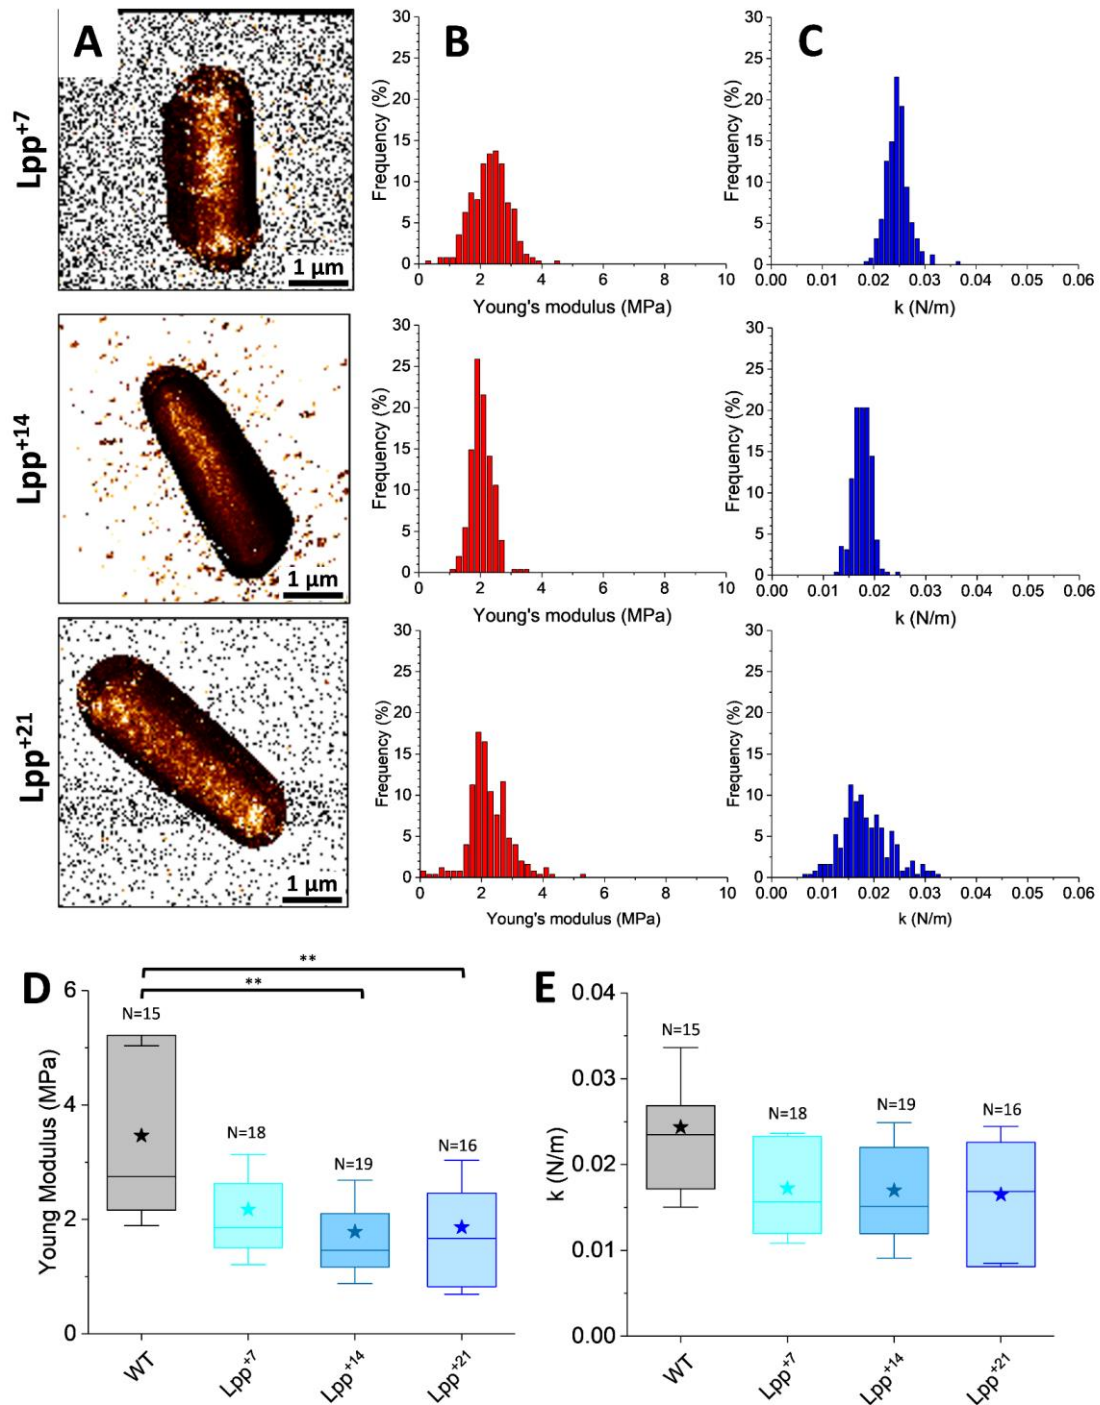

**Supplementary Figure 4. Effect of *Lpp* length on *E. coli* cell envelope mechanics.** (A) Elasticity maps in PBS of representative cells from the three strains exhibiting a longer version of *Lpp* (QI mode, 128 x 128 curves, color scale: 10 MPa). These images are representative of at least three independent experiments. Distribution of Young's modulus (B) and spring constant (C) values obtained by force-volume measurements across the surface of one representative cell (16 x 16 curves, 250 x 250 nm<sup>2</sup>) of each strain. Statistical analysis performed for each strain, showing the *Lpp* length-dependent softening of *E. coli* strains: (D) Young's modulus and (E) spring constant. Shown here are the mean values (star), the median, the 25% and 75% quartiles (boxes), and the standard deviation (whiskers) obtained from N independent cells over at least three independent experiments. \*\* indicates P ≤ 0.001. Source data are provided as a Source Data file.

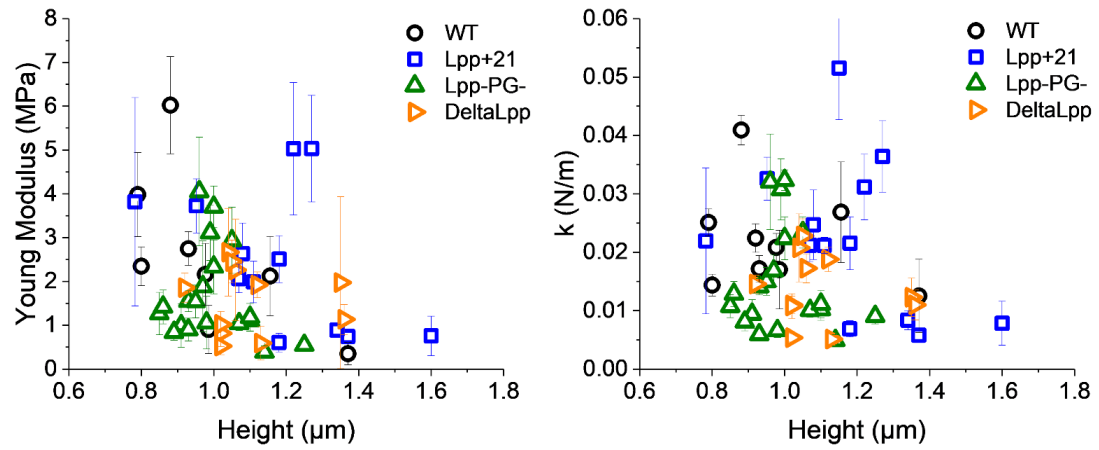

**Supplementary Figure 5. Morphological-dependent mechanical properties of *E. coli*.** Young's modulus and spring constant of some representative cells for each of the main Lpp mutation as a function of cell height. Each dot represents one independent cell (mean  $\pm$  SD). Source data are provided as a Source Data file.

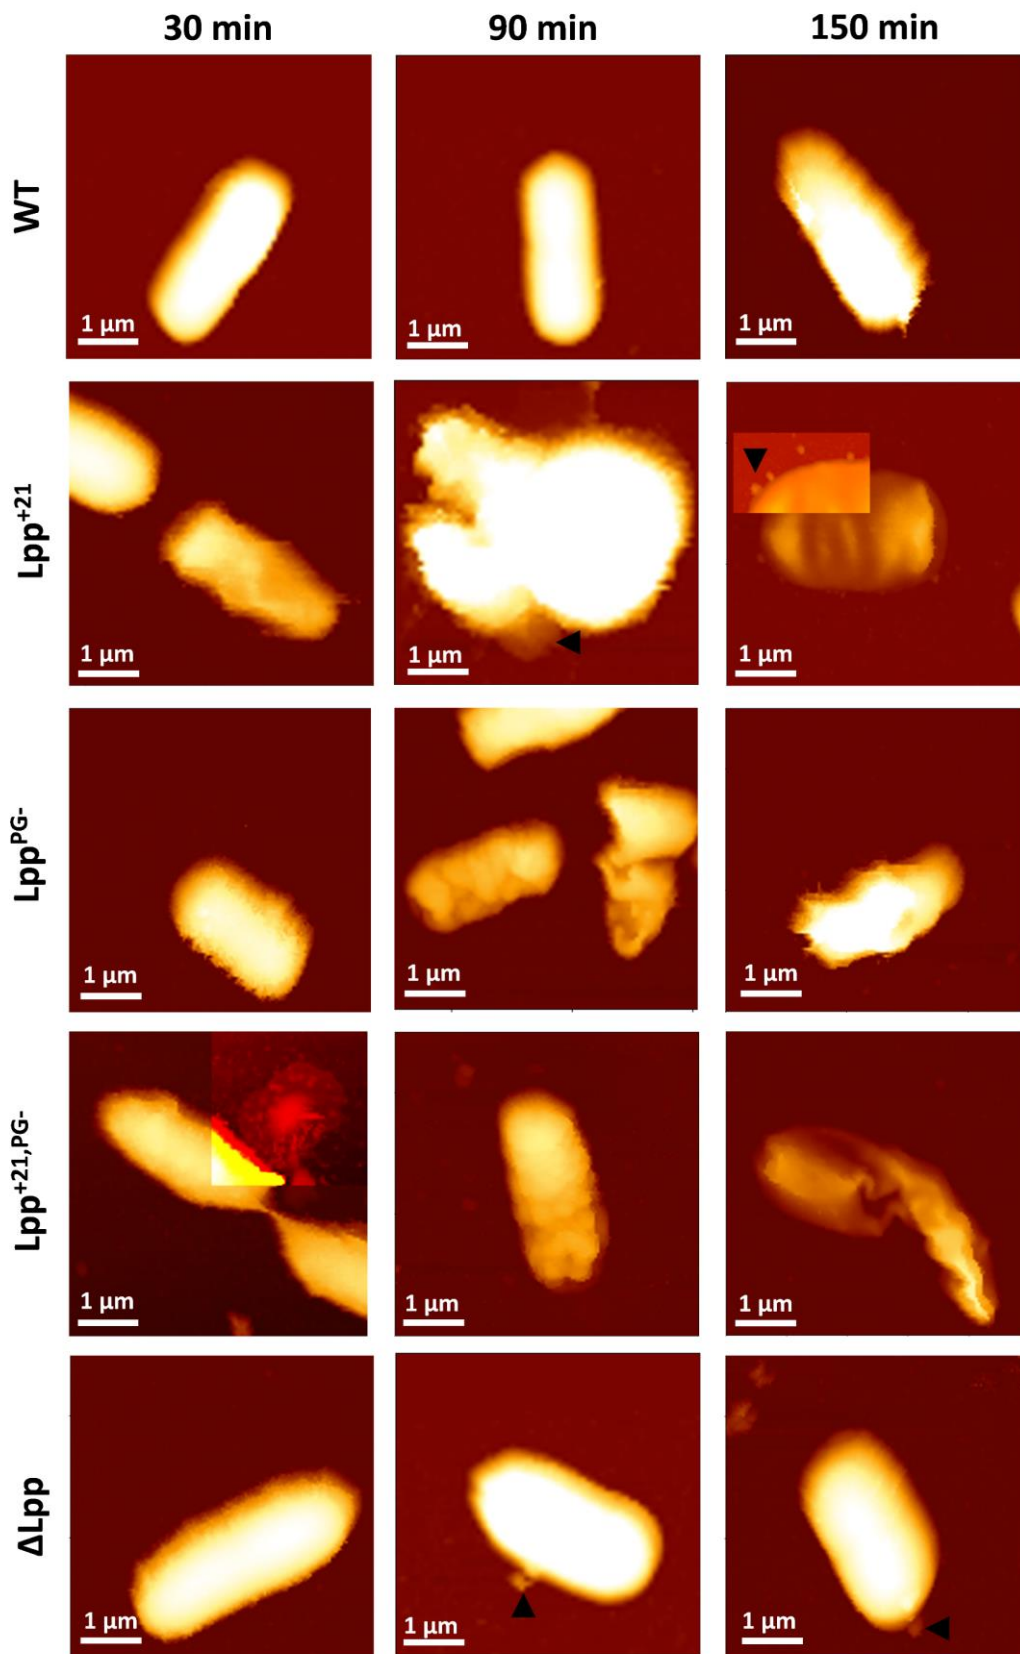

**Supplementary Figure 6. Vancomycin treatment damages the morphology of *E. coli* cells in a time and Lpp-mutation dependent manner.** AFM height images (color scale: 1.2  $\mu\text{m}$ ) of *E. coli* strains after vancomycin treatment over time (100  $\mu\text{g}/\text{mL}$ ). Interesting features are highlighted with black arrows. These images are representative of at least three independent experiments.

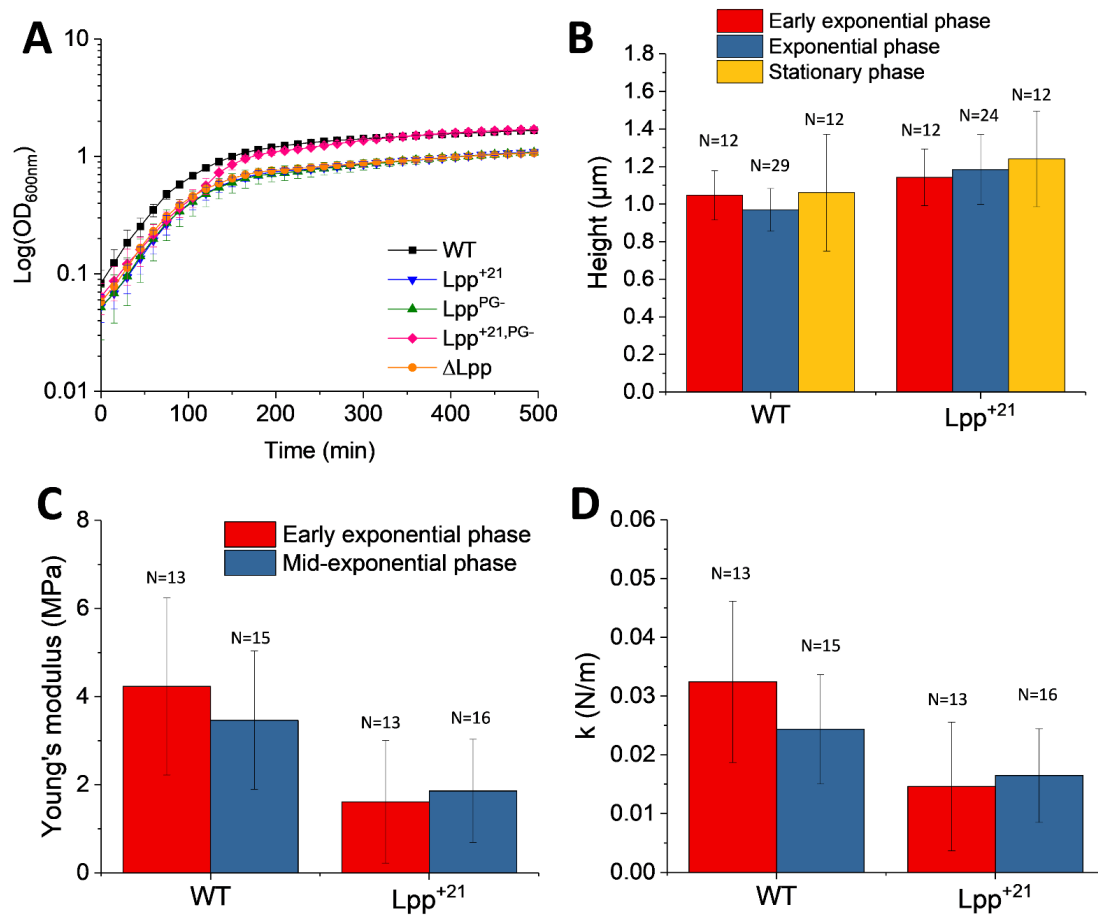

**Supplementary Figure 7. Effect of Lpp mutations on *E. coli* growth rate.** (A) Instantaneous growth rate of *E. coli* cells depending on the Lpp mutation. Error bars account for three replicates. (B) Influence of the growth state of WT and  $Lpp^{+21}$  cells on their height (data are presented as mean  $\pm$  SD over N independent cells), estimated from AFM images. (C-D) Influence of the growth state of WT and  $Lpp^{+21}$  cells on their mechanical properties, Young's modulus and spring constant (data are presented as mean  $\pm$  SD over N independent cells). The early exponential phase corresponds to an  $OD_{600}$  of 0.2-0.3, the mid-exponential phase to an  $OD_{600}$  of 0.5-0.6 and the stationary phase to an  $OD_{600}$  of 1.0-1.2. Source data are provided as a Source Data file.



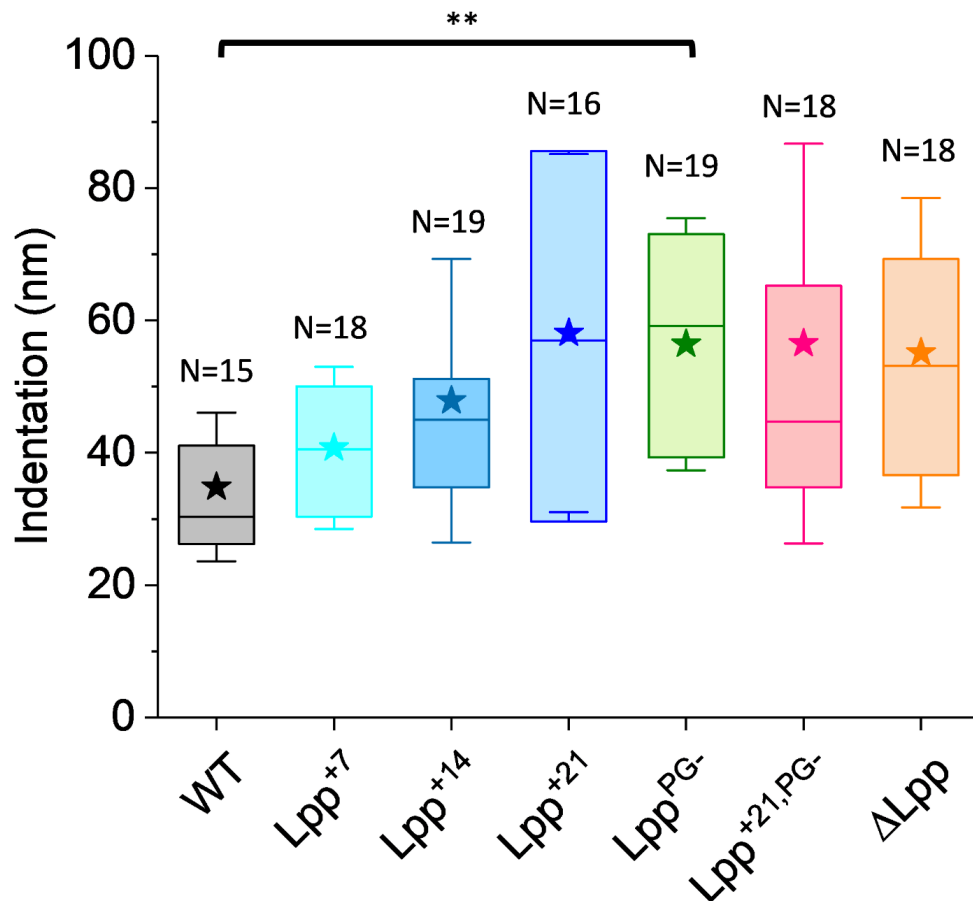

**Supplementary Figure 8. *E. coli* cell deformation depends on the Lpp functional mutation.** Box plot reporting the indentation observed on each bacterial strain when recording force curves at  $F = 0.5$  nN. Shown here are the mean values (star), the median, the 25% and 75% quartiles (boxes), and the standard deviation (whiskers) obtained from  $N$  independent cells over at least three independent experiments. \*\* indicates  $P \leq 0.001$ . Source data are provided as a Source Data file.
